# Supplementary material for: Fmoc-FF and hexapeptide-based multicomponent hydrogels as scaffold materials
Source: Royal Society of Chemistry journal article supplement (doi:10.1039/c8sm02366b), 2018-12-13
Supplement: c8sm02366b1.pdf [file c8sm02366b1.pdf]

## Supplementary Information

### **Fmoc-FF and hexapeptides-based multicomponent hydrogels as scaffold materials**

Carlo Diaferia,<sup>a,b</sup> Moumita Ghosh,<sup>b</sup> Teresa Sibillano,<sup>c</sup> Enrico Gallo,<sup>a</sup> Mariano Stornaiuolo,<sup>a</sup> Cinzia Giannini,<sup>c</sup> Morelli Giancarlo,<sup>a</sup> Lihi Adler-Abramovich,<sup>\*b</sup> Antonella Accardo<sup>\*a</sup>

<sup>a</sup> Department of Pharmacy, Research Centre on Bioactive Peptides (CIRPeB), University of Naples “Federico II”, Via Mezzocannone 16, 80134 Naples (Italy) e-mail: antonella.accardo@unina.it

<sup>b</sup> Department of Oral Biology, The Goldschleger School of Dental Medicine, Sackler Faculty of Medicine, Tel Aviv University, Tel Aviv 69978, Tel Aviv (Israel) e-mail: LihiA@tauex.tau.ac.il

<sup>c</sup> Institute of Crystallography (IC), CNR, Via Amendola 122, 70126 Bari (Italy)

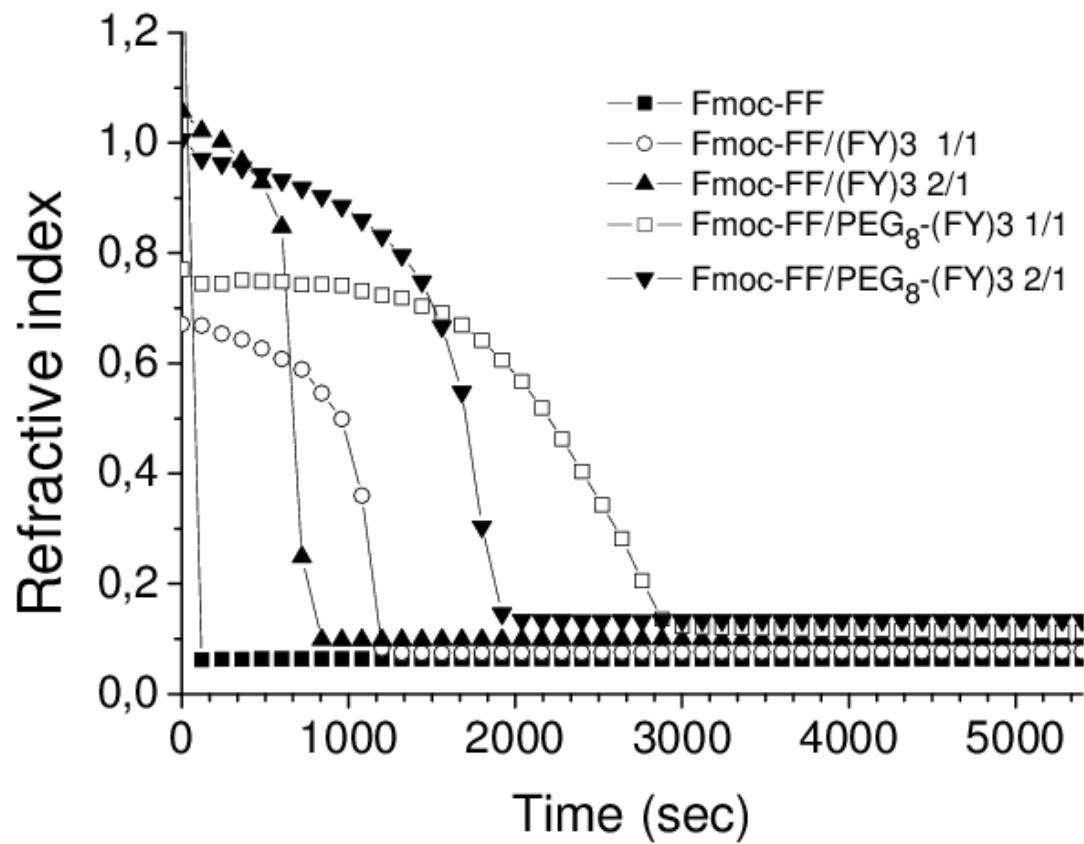

**Figure S1:** Refractive index of non-PEGylated (a) and PEGylated (b) mixed hydrogels in the Fmoc and Phe channels compared to pure Fmoc-FF. Data were collected by measuring the UV-Vis spectra as function of the time.

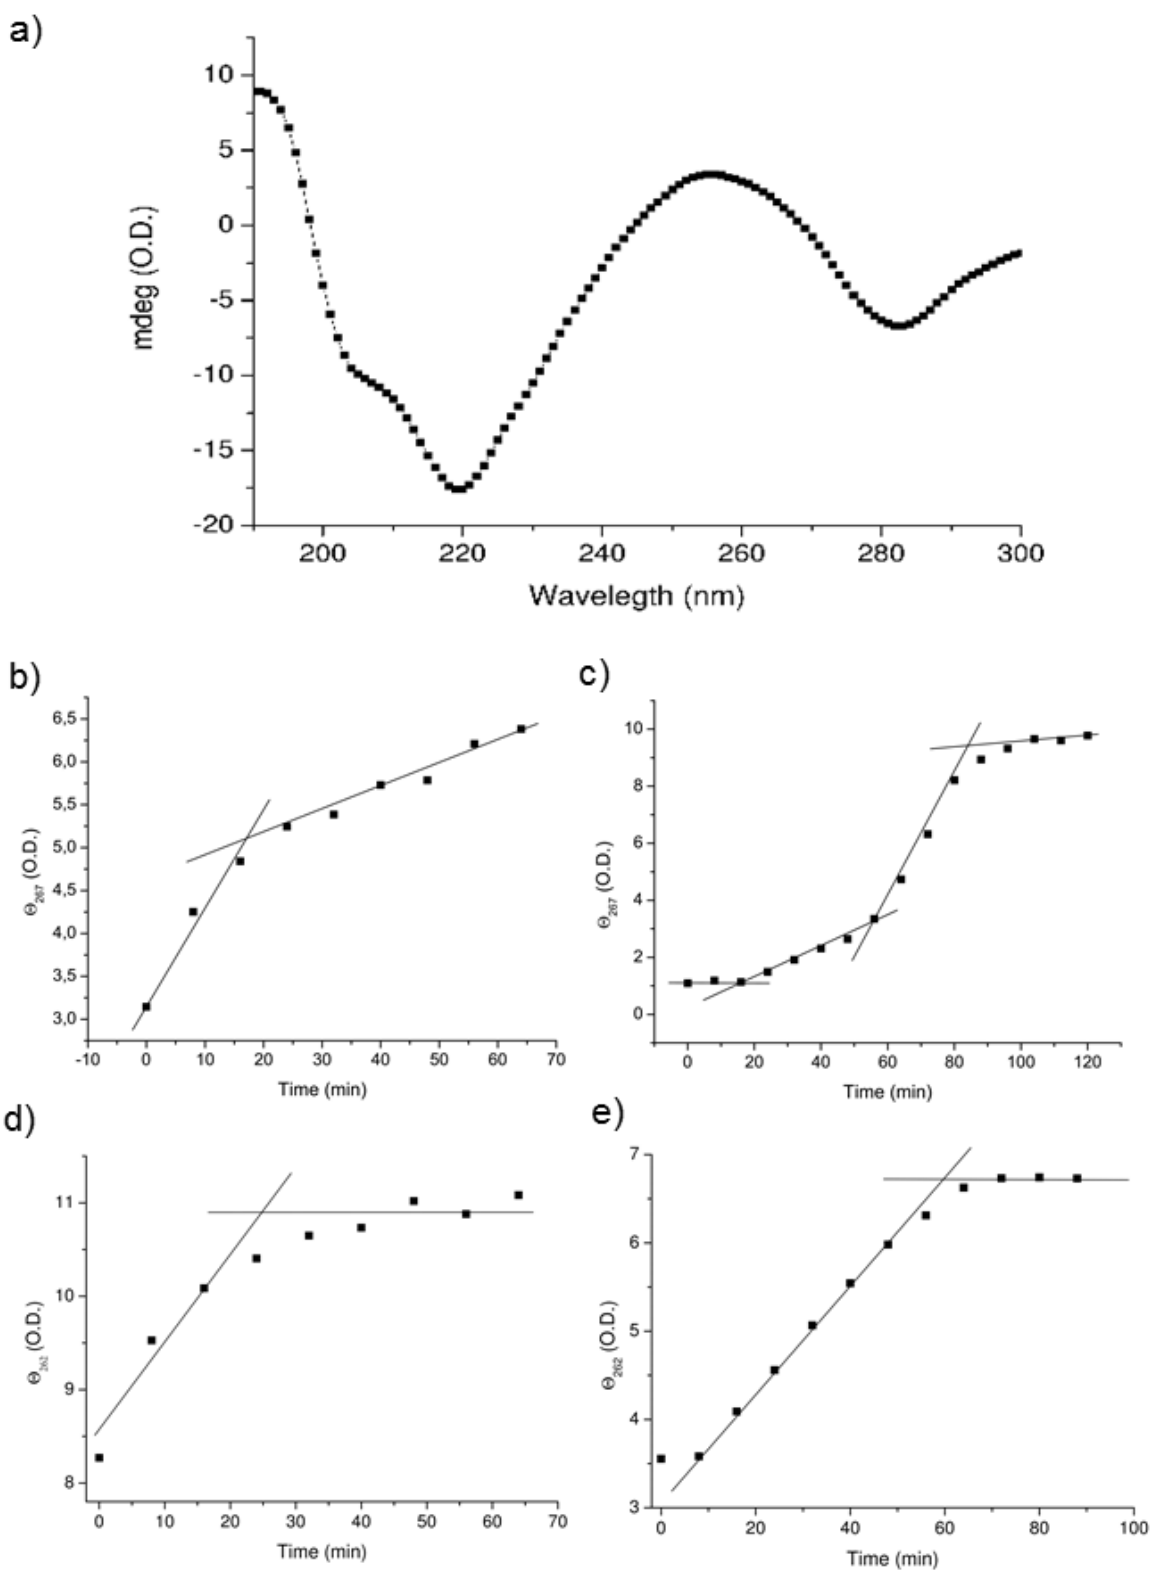

**Figure S2:** CD spectra of a) Fmoc-FF at 0.5 wt%. Optical density in the maximum (262 or 267 nm) as function of the time for Fmoc-FF/(FY)3 (2/1) (b) Fmoc-FF/(FY)3 (1/1) (c) Fmoc-FF/PEG<sub>8</sub>-(FY)3 (2/1) (d) Fmoc-FF/PEG<sub>8</sub>-(FY)3 (1/1) (e).

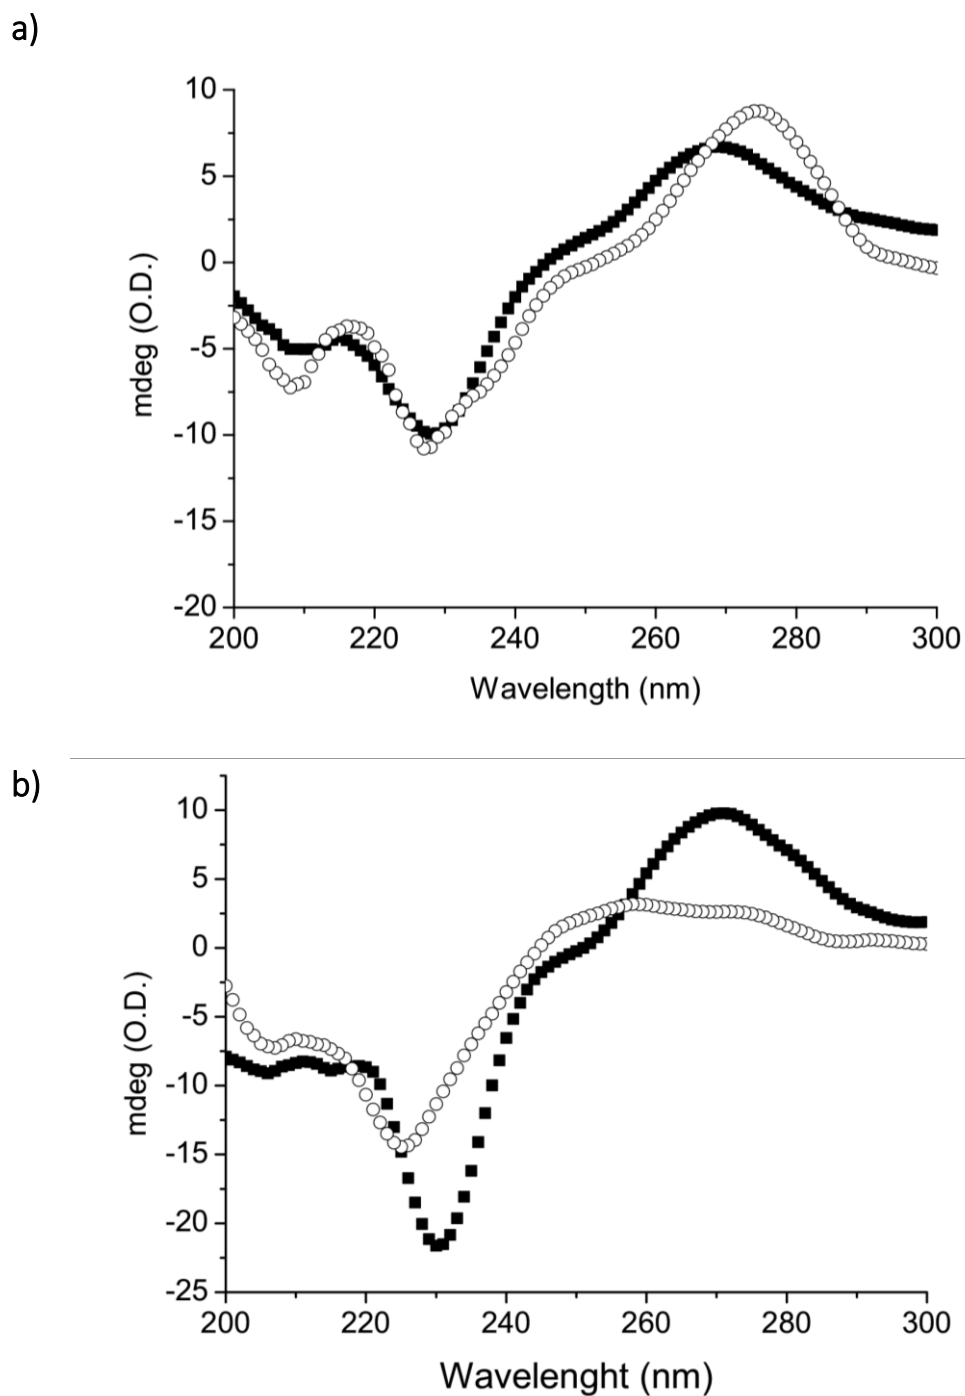

**Figure S3:** Comparison between acquired spectrum (black squares) and calculated sum spectrum (white circles) for a) Fmoc-FF/(FY)3 (2/1) and b) Fmoc-FF/(FY)3 (1/1).

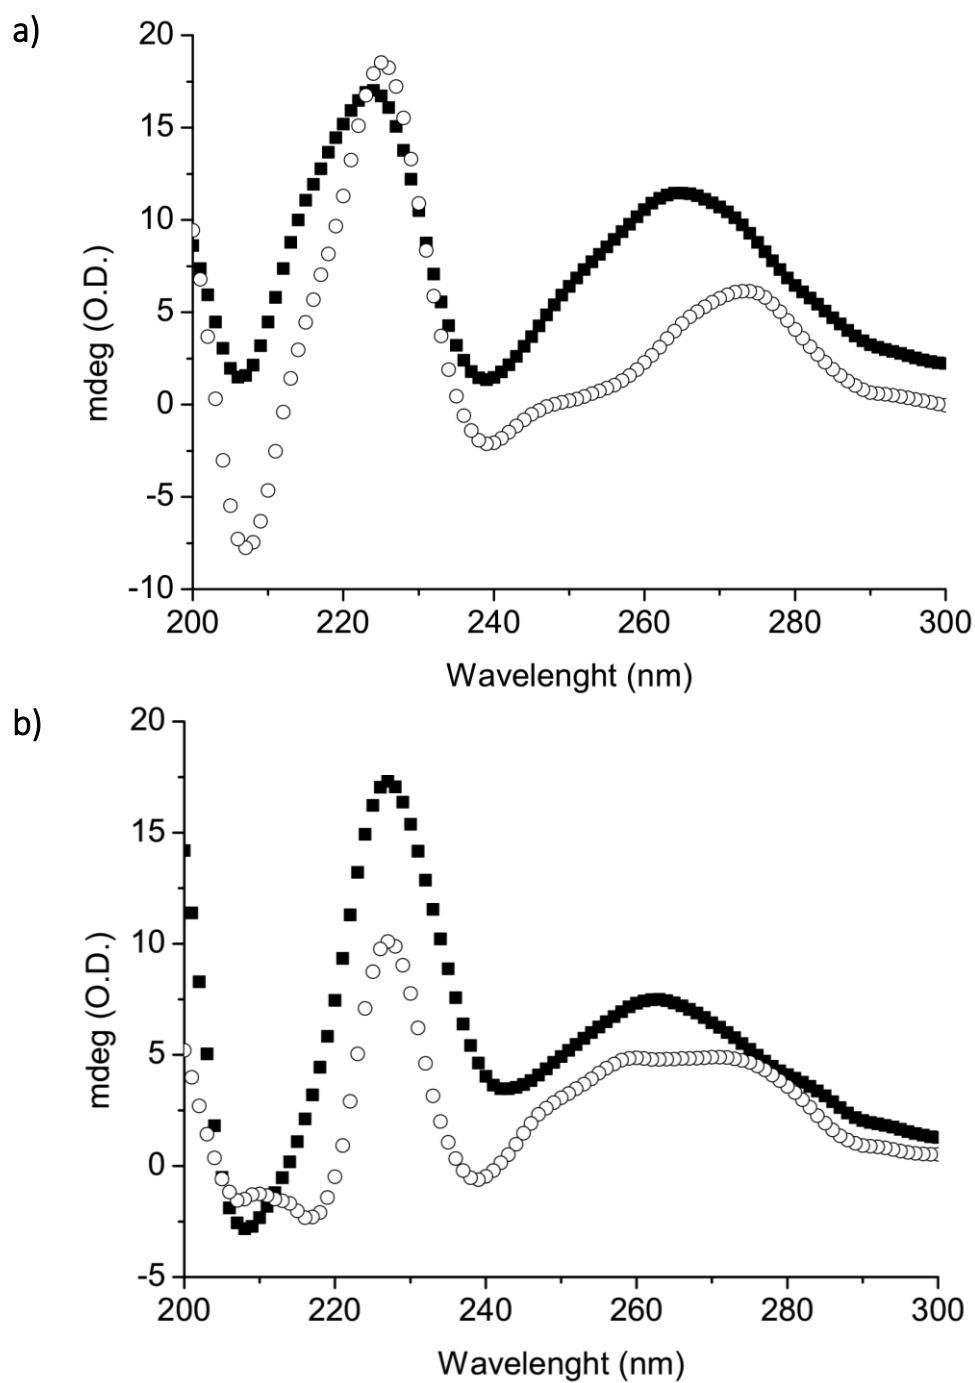

**Figure S4:** Comparison between acquired spectrum (black squares) and calculated sum spectrum (white circles) for a) Fmoc-FF/PEG<sub>8</sub>(FY)<sub>3</sub> (2/1) and b) Fmoc-FF/ PEG<sub>8</sub>(FY)<sub>3</sub> (1/1).

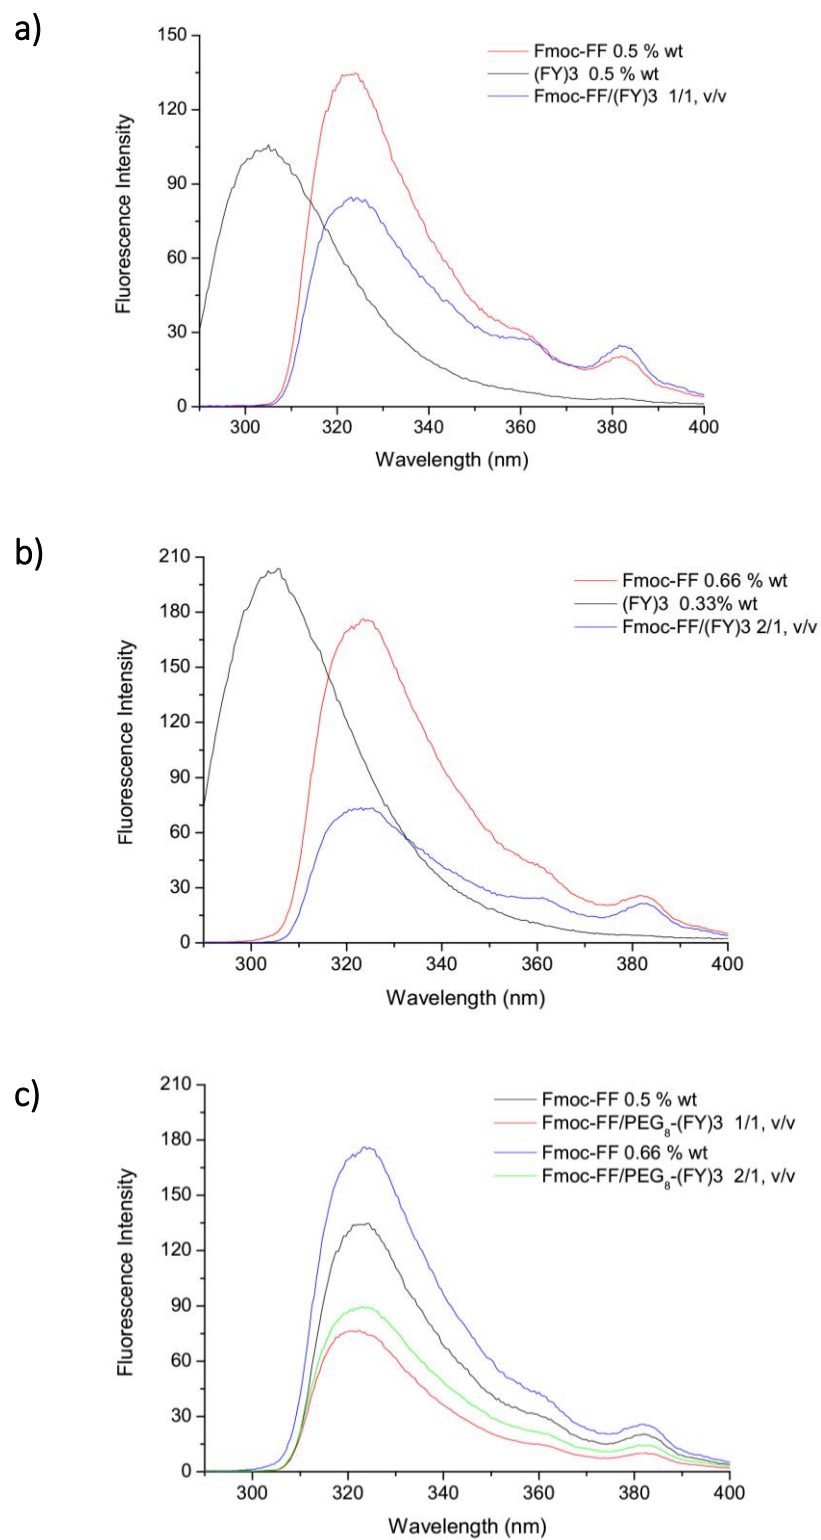

**Figure S5:** Fluorescence spectra of pure and multicomponent hydrogels recorded exciting peptide solutions at 280 nm.

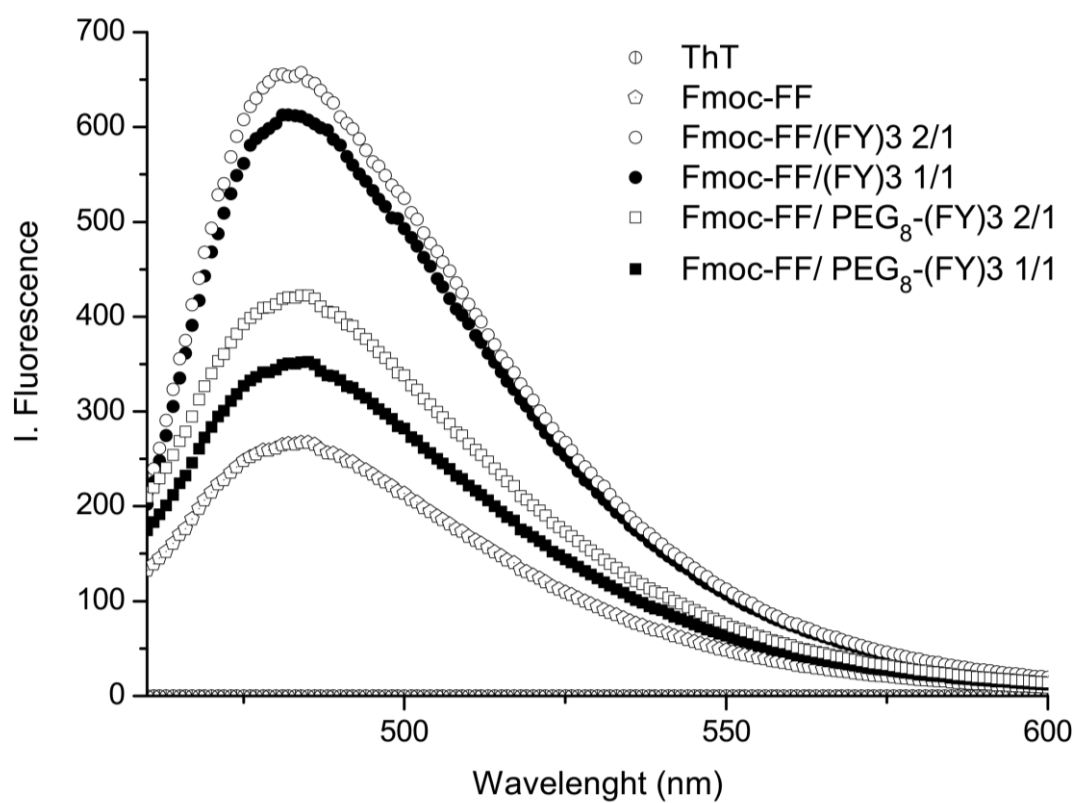

**Figure S6:** Fluorescence spectra of pure Fmoc-FF and multicomponent hydrogels incubated with Thioflavin T (ThT 50 $\mu$ M) exciting samples at 450 nm. ThT spectra is reported as blank.

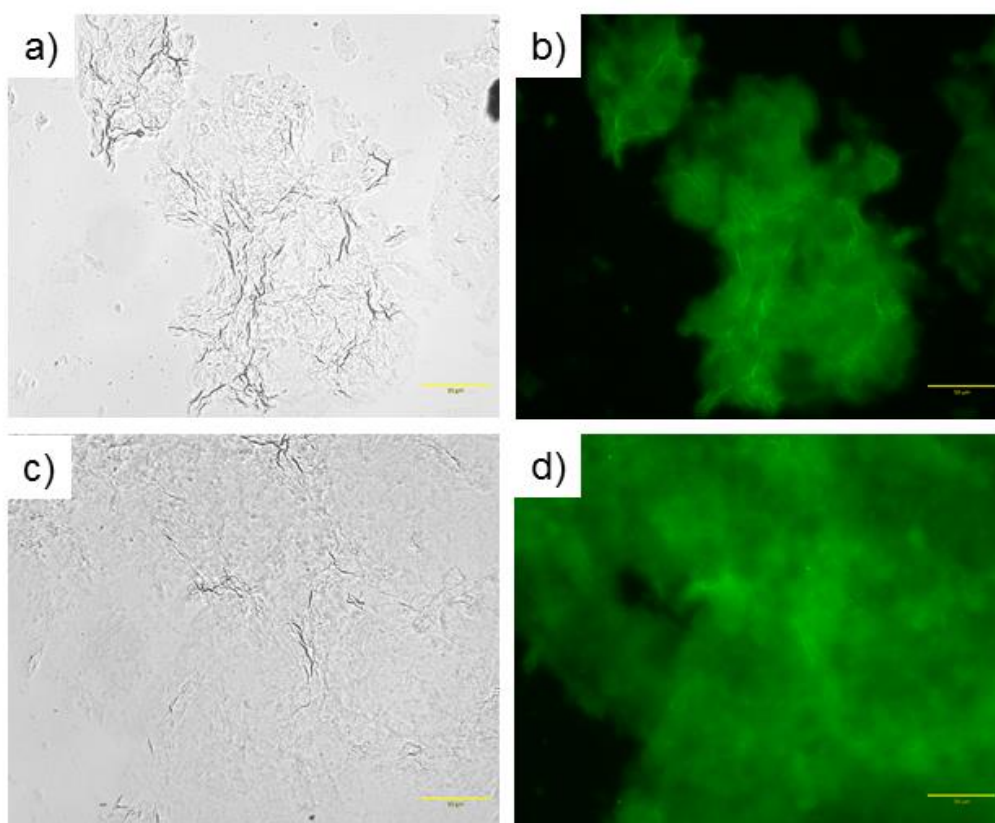

**Figure S7:** Fluorescence microscopy images of solutions containing Fmoc-FF/(FY)3 1/1 v/v (a,b) and Fmoc-FF/PEG<sub>8</sub>-(FY)3 1/1 v/v (c,d) mixed hydrogels 0.5%wt and 20  $\mu$ M ThT. Samples are imaged in the bright field (b,d) and in the spectral regions of the GFP (Green Fluorescent Protein  $\lambda_{exc}$  = 488 nm,  $\lambda_{em}$  = 507 nm) (a,c). The scale bar = 50  $\mu$ m.



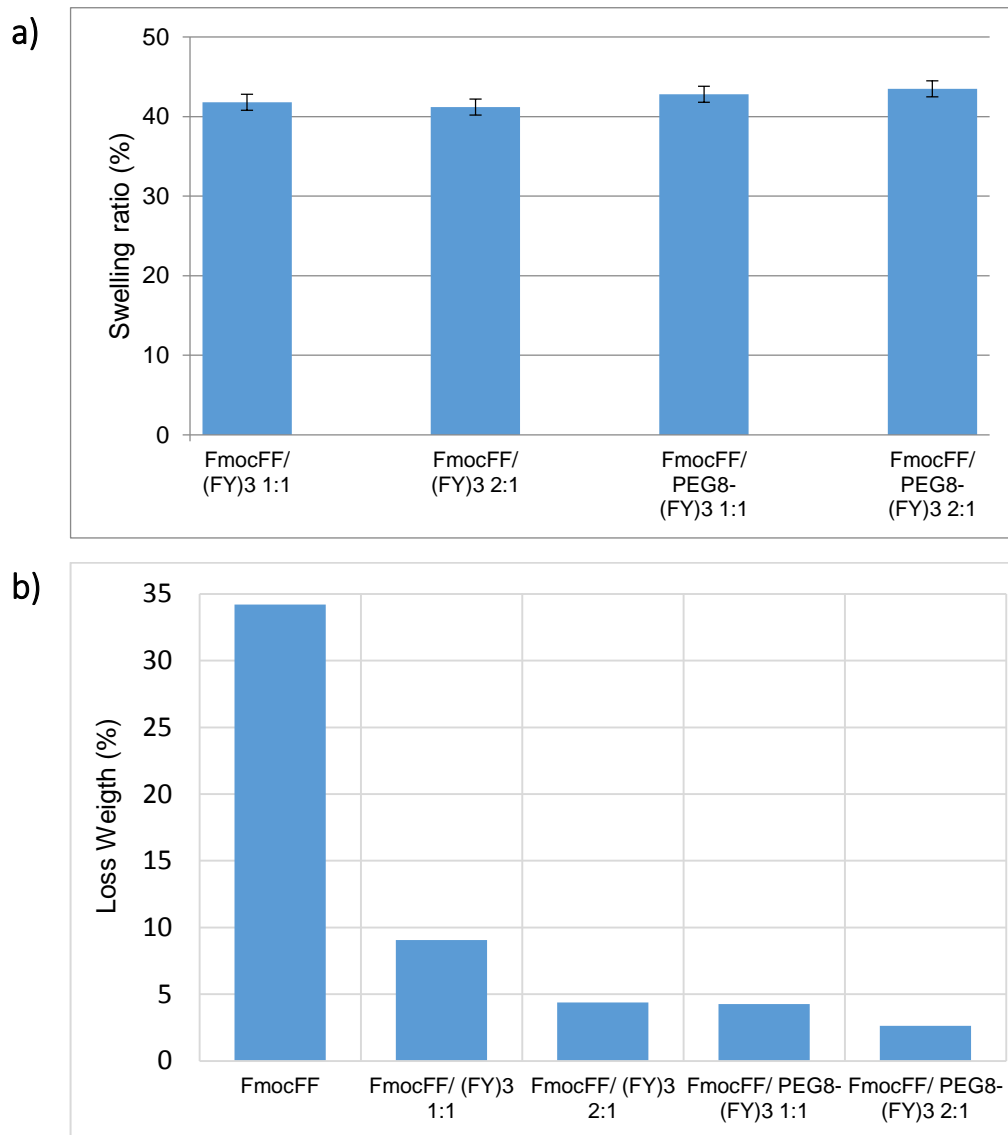

**Figure S8:** a) Swelling ratio and b) loss weight percentage for hydrogels
